# Supplementary material for: Hybrid organic PVDF–inorganic M–rGO–TiO2 (M = Ag, Pt) nanocomposites for multifunctional volatile organic compound sensing and photocatalytic degradation–H2 production
Source: Royal Society of Chemistry journal article supplement (doi:10.1039/c3nr03276k), 2013-01-01
Supplement: c3nr03276k.pdf [file c3nr03276k.pdf]

## Supplementary Information

### Hybrid organic PVDF-inorganic M-rGO-TiO<sub>2</sub> (M=Ag, Pt) nanocomposite for multifunctional volatile organic compound sensing and photocatalytic degradation-H<sub>2</sub> production

W L Ong, M Gao and G W Ho\*

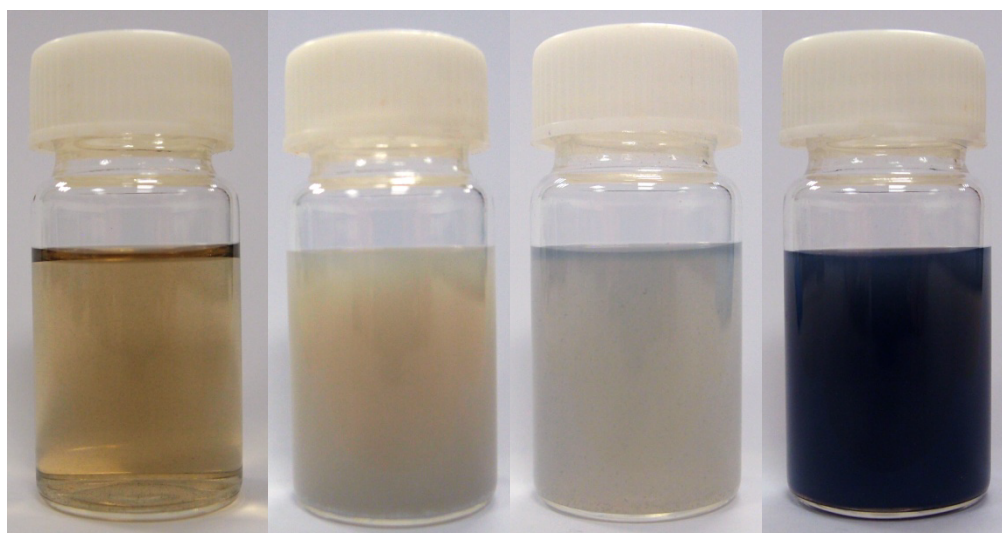

**Figure S1.** Digital photographs illustrating the color change of the sample with the reduction of GO (from left to right): suspension of GO in methanol-water solvent, suspension of GO-TiO<sub>2</sub> NTs before photoreduction, suspension of rGO-TiO<sub>2</sub> NTs after 1 h of photoreduction, and suspension of rGO-TiO<sub>2</sub> NTs after completion of photoreduction.
